# Supplementary material for: Improved Recovery from Liver Fibrosis by Crenolanib
Source: Cells. 2021 Apr 4;10(4):804. doi: 10.3390/cells10040804 (PMC8067177; doi:10.3390/cells10040804)
Supplement: Supplementary file 1 [file cells-10-00804-s001.pdf]

# Improved recovery from liver fibrosis by Crenolanib

Doreen Reichert, Louisa Adolph, Jan Philipp Köhler, Tobias Buschmann, Tom Luedde, Dieter Häussinger, Claus Kordes\*

Clinic of Gastroenterology, Hepatology and Infectious Diseases, Heinrich-Heine-University, Moorenstraße 5, 40225 Düsseldorf, Germany; \*Correspondence: claus.kordes@hhu.de; Tel.: 0049-211-81-14445

Supplemental Table S1: Primer sets used for qPCR analysis.

| Gene            | Forward Primer         | Reverse Primer         | bp  | Accession No.  |
|-----------------|------------------------|------------------------|-----|----------------|
| $\alpha$ Sma    | GCACTACCATGTACCCAGGCA  | TGCGTTCTGGAGGAGCAA     | 102 | NM_031004.2    |
| Afp             | ACCTGACAGGGAAGATGGTG   | GCAGTGGTTGATACCGGAGT   | 155 | NM_012493.2    |
| albumin         | CTTCAAAGCCTGGGCAGTAG   | GCAGTGGCTTATCACAGCAA   | 221 | NM_134326.2    |
| Bsep            | TACCAGGAAAAGCGTGTGTG   | CCCAGTGATGACCCATAACC   | 197 | NM_031760.1    |
| Ck18            | CAGAAGAACCGTGAGGAACGTG | TTCATCGAGTCCAGGTCAATC  | 161 | NM_053976.1    |
| Ck19            | CCTTCCGTGATTACAGCCAGT  | CTGTCTCAAACCTTGGTCCGGA | 147 | NM_199498.2    |
| cMet            | GCACCCCAAAGCTGGTAATA   | GATCCGGTTGAACGATCACT   | 477 | NM_031517.2    |
| Col1 $\alpha$ 2 | ACCTCAGGGTGTTC AAGGTG  | CGGATTCCAATAGGACCAGA   | 222 | NM_053356.1    |
| desmin          | AGCCTGGGTGAGAGACAGAA   | TATCTCCTGCTCCCACATCC   | 155 | NM_022531.1    |
| Dusp1           | GAGCTGTGCAGCAAACAGTC   | CCAGGTACAGGAAGGACAGG   | 151 | NM_053769.3    |
| Dusp2           | TCACAGCGGTTCTCAATGTC   | GCCCCACTATTCTTCACTG    | 158 | NM_001012089.1 |
| Dusp4           | CATGGAAGCCATCGAATACA   | AACTCGAAAGCCTCCTCCA    | 150 | NM_022199.1    |
| Dusp5           | ACAAGTGGATCCCTGTGGAG   | TGAGGTAAGCCATGCAGATG   | 162 | NM_133578.1    |
| Dusp6           | GCTGCTGCTCAAGAACTCA    | CAGACTCAATGTCCGAGGAAG  | 200 | NM_053883.2    |
| Dusp7           | CACTGGAGCCAGAACCTCTC   | CATCTTCTGCATCAGGTAGGC  | 150 | NM_001100547.1 |
| Dusp8           | CATCTGTGAGAGCCGTTTCA   | AGAAATGCCAGCCAGACAGT   | 148 | NM_001108510.1 |
| Dusp9           | GAAGCTGAAGAGTGGGATGC   | CCACTGAAGCTGGTTTCACA   | 146 | NM_001037973.1 |
| Dusp10          | AGCAGGATGCTCAGGACCTA   | GCAAGTTCTGCTTGTGCTG    | 150 | NM_001105734.1 |
| Dusp16          | CAGCGAGATGTCTCAACAA    | AGGGCAGGATTTTCTCACA    | 154 | NM_001106624.2 |
| Egf             | CTGTGATTGAAATGGCCGATCT | CCTGTTTTGACCAGTCTCTTG  | 164 | NM_012842.1    |
| Epcam           | TGCATACTGCACTTCAGGACA  | GGAACAAGGACTCCCCCTTA   | 195 | NM_138541.1    |
| Fgf1            | GGCCACTTCTTGAGGATCTTC  | GTATAAAAGCCCTTCGGTGTCC | 165 | NM_012846.1    |
| Fgf2            | GAACCGGTACCTGGCTATGA   | CCGTTTTGGATCCGAGTTTA   | 182 | NM_019305.2    |
| Fgf7            | CTGTGGCAGTTGGAATTGTGG  | CGCTGTGTGCCATTTAGCTG   | 174 | NM_022182.1    |
| Fgf9            | GGACTCTACCTCGGCATGAA   | GTATCTCCTTCCGGTGTCCA   | 150 | NM_012952.1    |
| Fgf10           | GTGGAAATCGGAGTTGTTGCC  | CCGTTGTGCTGCCAGTTAAAA  | 173 | NM_012951.1    |
| Fgf12           | CGGGGTGTTCAAGCAAGT     | AGTCGCTGTTTTCTCCTTG    | 170 | NM_13814.1     |
| Fgfr1           | AGCTGGCGTCTCTGAATATG   | GGTTGGGTTTGTCTTATCC    | 149 | NM_024146.1    |
| Fgfr2           | CGAATACGCATCGAAAGGCAA  | GCTGCCAAGTCTCGATGGATA  | 195 | NM_001109896.1 |
| Fgfr3           | GAGGATGCTGGGGTCTACAG   | CGGTCGAGTCCAGTAAGGAG   | 153 | NM_053429.1    |
| Fgfr4           | GCTATCTGTGGATGTGCTG    | CTGCCGTTGATAACGATGTG   | 169 | NM_001109904.1 |
| Foxa2           | GTGAAGATGGAAGGGCACGAG  | TGACATGTTTCATGGAGCCTGC | 186 | NM_012743.1    |
| Gpbar1/Tgr5     | TTCTCTCTGTCCGAGTGTGG   | CACAGCAAAAAGAGCAGTGTG  | 160 | NM_177936.1    |
| Gs              | ACGCTGCAAGACCCGTAATC   | TGGAGCCTTCAGACTGAAACG  | 101 | NM_017073.4    |
| Hgf             | CGAGCTATCGCGGTAAAGAC   | TGTAGCTTTCACCGTTGCAG   | 165 | NM_017017.2    |
| Hnf1 $\alpha$   | CAGCCACAACCATTCACATC   | CGTTGGAGTCAGAACTCTGGT  | 132 | NM_001306179.2 |
| Hnf4 $\alpha$   | AAATGTGCAGGTGTTGACCA   | CACGCTCCTCCTGAAGAATC   | 178 | NM_022180.2    |
| Hprt1           | AAGTGTGGATACAGGCCAGA   | GGCTTTGTACTTGGCTTTTCC  | 145 | NM_012583.2    |
| Mrp2            | TCATCCCTCACAACTGCCTC   | ATTCATCCTCAGACTCCCCGA  | 162 | NM_012833.2    |
| Ntcp            | AACATTGAAGCTCTGGCCATC  | CACTGAAGCTGGAGCAGGTG   | 130 | NM_017047.2    |
| Rps6            | GGAAGCGCAAGTCTGTCCGA   | AGGTCCCAACCGACGAGGCA   | 131 | NM_017160.1    |
| Sox9            | TCTCTCCTAACGCCATCTTCA  | AGATCAACTTTCAGCTTGC    | 163 | NM_080403.2    |

**Supplemental Table S2: Antibodies used for western blot and immunofluorescence.**

| Antibody                         | Species | Company               | Order No. |
|----------------------------------|---------|-----------------------|-----------|
| $\alpha$ SMA                     | mouse   | Dako                  | 00072869  |
| $\gamma$ -tubulin                | mouse   | Sigma-Aldrich         | T5326     |
| AKT                              | rabbit  | Cell Signaling        | 9272      |
| BiP                              | rabbit  | Cell Signaling        | 3183      |
| CD90                             | rabbit  | Cell Signaling        | 13801     |
| CD44                             | mouse   | Cell Signaling        | 5640      |
| CD146                            | mouse   | Life Span Biosciences | LS-C35841 |
| collagen 4                       | rabbit  | Abcam                 | ab6586    |
| CK18                             | mouse   | Acris                 | BM2275P   |
| CK19                             | rabbit  | Novus Bio             | NB100-687 |
| CK19                             | mouse   | Progen                | 65129     |
| desmin                           | mouse   | Dako                  | 00073088  |
| desmin                           | rabbit  | Cell Signaling        | 5332S     |
| DUSP1 / MPP-1                    | rabbit  | Merck Millipore       | 07-535    |
| FOXA2                            | rabbit  | Cell Signaling        | 8186      |
| GATA4                            | mouse   | Santa Cruz Biotech.   | sc-25310  |
| GFAP                             | mouse   | Chemicon              | mab3402   |
| HHEX                             | mouse   | Chemicon              | mab10071  |
| HNF4 $\alpha$                    | rabbit  | Cell Signaling        | 3113      |
| IRAK4                            | rabbit  | Cell Signaling        | 4363      |
| IRE1 $\alpha$                    | rabbit  | Santa Cruz Biotech.   | sc-390960 |
| nestin                           | mouse   | Santa Cruz Biotech.   | sc-33677  |
| PDGFR- $\alpha$                  | rabbit  | Cell Signaling        | 3164      |
| PDGFR- $\beta$                   | rabbit  | Cell Signaling        | 3169      |
| phospho-p38 MAPK (Thr180/Tyr182) | rabbit  | Cell Signaling        | 9211      |
| phospho AKT (Ser473)             | rabbit  | Cell Signaling        | 4058      |
| phospho-ERK1/2 (Thr202/Tyr204)   | mouse   | Cell Signaling        | 9106      |
| phospho-JNK (Thr183/Tyr185)      | rabbit  | Cell Signaling        | 4671      |
| phospho-MAPKAPK2 (Thr222)        | rabbit  | Cell Signaling        | 3316      |
| SOX17                            | goat    | R&D Systems           | AF1924    |
| SPARCL1                          | mouse   | Santa Cruz Biotech.   | sc-514275 |
| total ERK1/2                     | rabbit  | Millipore             | 06-182    |
| total JNK                        | mouse   | BD                    | 554285    |
| total p38 MAPK                   | mouse   | Cell Signaling        | 9212      |
| total MAPKAPK2                   | rabbit  | Cell Signaling        | 3042      |
| vimentin                         | mouse   | Dako                  | 20022872  |
| anti-ms-IgG, Cy3                 | donkey  | Millipore             | AP192C    |
| anti-ms-IgG, FITC                | donkey  | Millipore             | AP192F    |
| anti-ms-IgG, HRP                 | donkey  | Millipore             | AP192P    |
| anti-rb-IgG, Cy3                 | donkey  | Millipore             | AP182C    |
| anti-rb-IgG, FITC                | donkey  | Millipore             | AP182F    |
| anti-rb-IgG, HRP                 | donkey  | Millipore             | AP182P    |

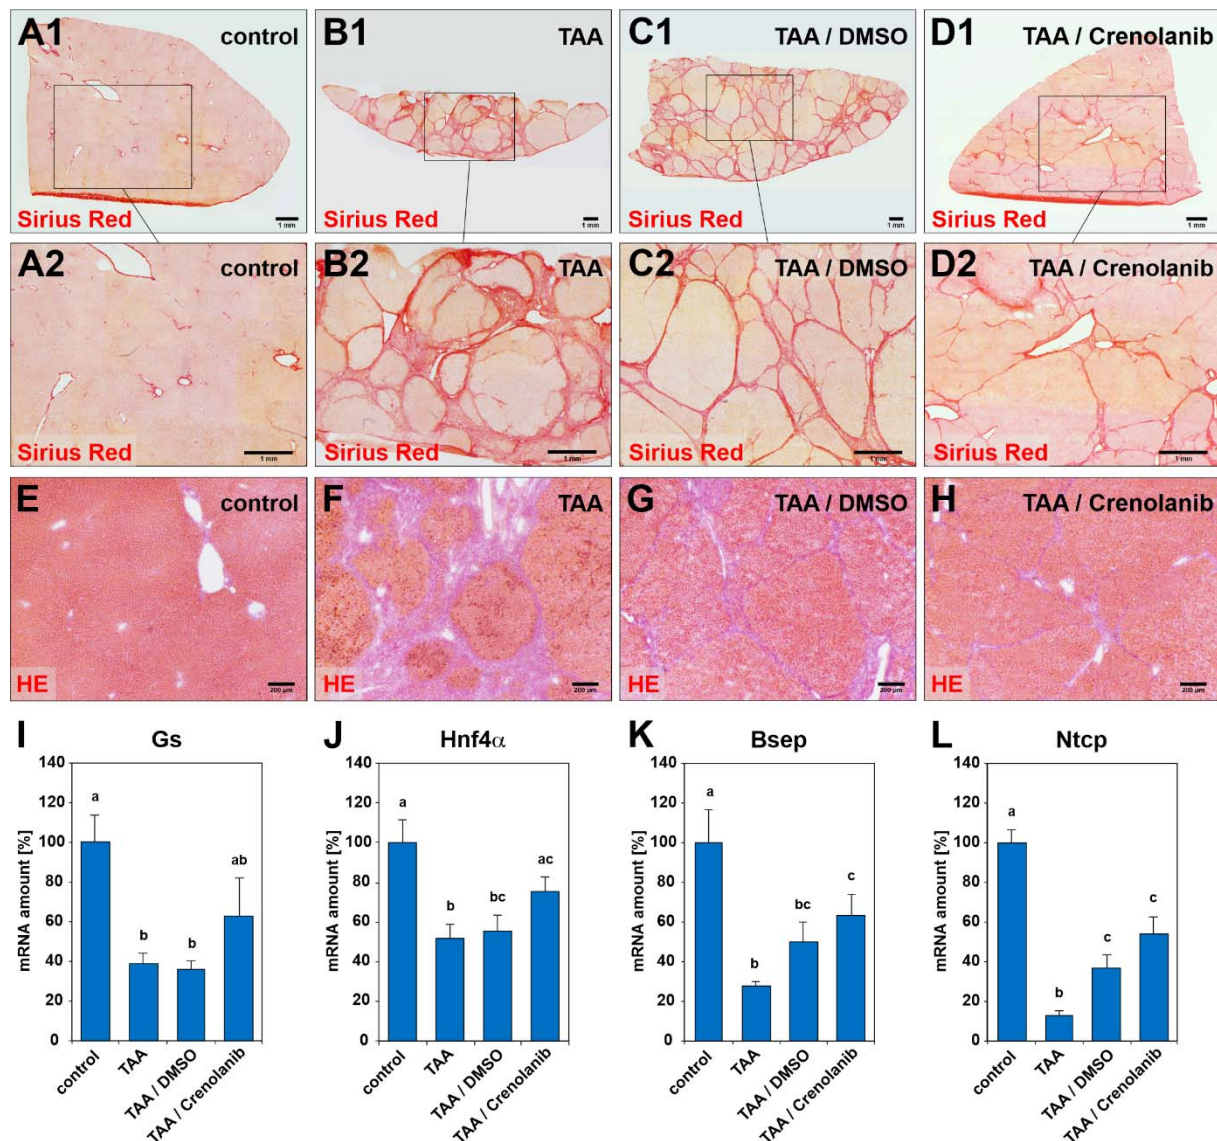

**Supplemental Figure S1: Improved recovery of Crenolanib-treated rat livers from fibrosis.** (A1-D2) Liver sections from rats were stained with Sirius Red to show connective tissue deposits. A2-D2 (scale bars: 200 μm) show magnifications of A1-D1 (scale bars: 1 mm). Complete tissue sections were scanned at low magnification (4x objective) and images were composed by the CellSens Dimension imaging software (Olympus). (E-H) HE colorings of liver tissue sections from rats (scale bars: 200 μm). (A1, A2, E) Rats were left untreated or (B1, B2, F) treated with TAA for 18 weeks to induce liver fibrosis. The livers could recover from liver fibrosis for 14 days after cessation of TAA treatment in the (C1, C2, G) absence and (D1, D2, H) presence of Crenolanib. (C1, C2, G) The control group with fibrosis, allowed to recover for 14 days, was treated with the vehicle DMSO used as a solvent of Crenolanib. Stronger regression of fibrotic scars was observed in the (D1, D2, H) Crenolanib-treated rats compared to the (C1, C2, G) DMSO-treated animals. (I-L) Whole liver samples of the rats were investigated by qPCR with respect to the expression of hepatocyte-specific genes. The expression of (I) Gs, (J) Hnf4α, (K) Bsep, and (L) Ntcp tended to increase in the liver of the Crenolanib-treated rats in comparison to the DMSO control animals. This further suggested that Crenolanib supported the recovery of the rats from TAA-induced liver fibrosis (n = 4-6; p < 0.05; significant differences are indicated by different letters).

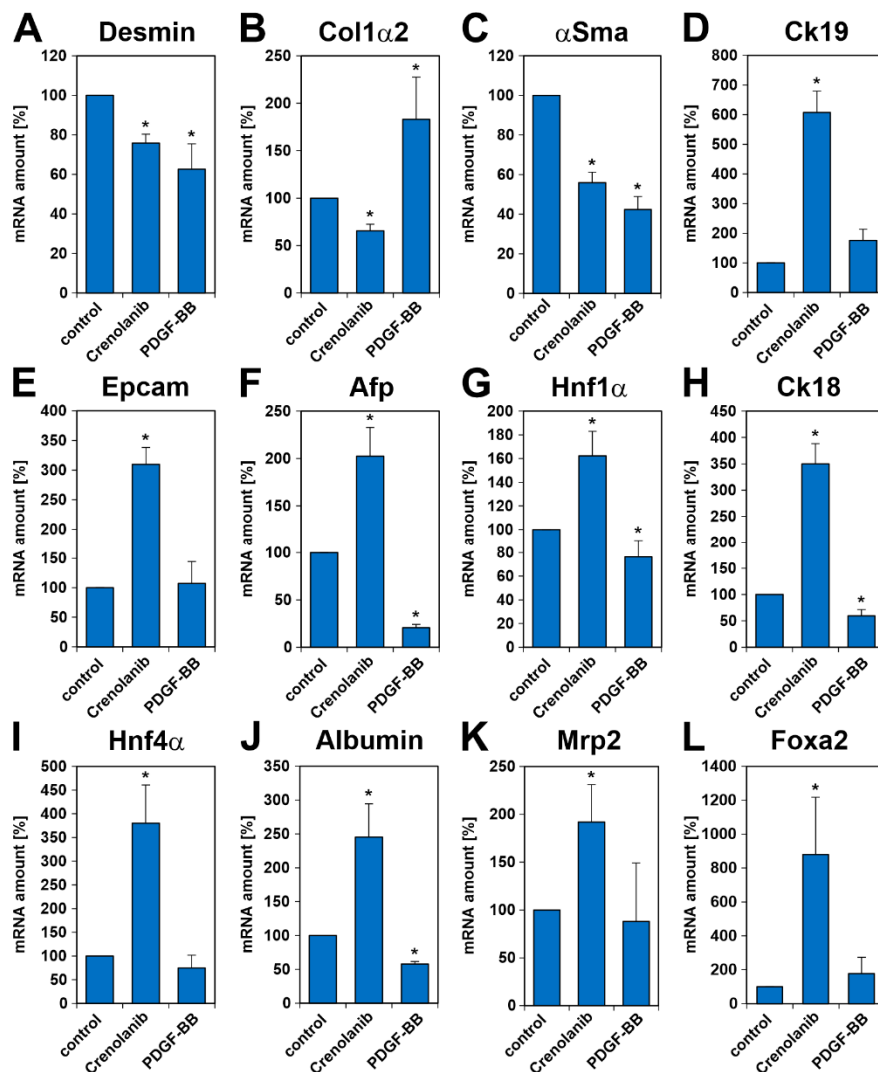

**Supplemental Figure S2: Crenolanib treatment lowered mesodermal but induced hepatocyte markers in isolated rat HSC.** (A–L) Primary HSC cultures ( $n = 5\text{--}40$ ) were treated with Crenolanib ( $0.1\ \mu\text{M}$ ) or  $20\ \text{ng/ml}$  PDGF-BB in serum-free medium for 7 days and finally analyzed by qPCR. (A–C) The mRNA of genes typically expressed by mesenchymal cells, (D–F) liver progenitor cells and (G–L) hepatocytes were measured by qPCR in comparison to untreated HSC (control, 100%). While the expression of mesodermal genes decreased after Crenolanib treatment, the mRNA levels of liver progenitor cell- and hepatocyte-associated genes increased significantly. In contrast, PDGF-BB treatment suppressed or had no effect on the expression of hepatocyte markers in HSC. Only the expression of Col1 $\alpha$ 2 increased in HSC in the presence of PDGF-BB (\* $p < 0.05$  in comparison to control HSC).

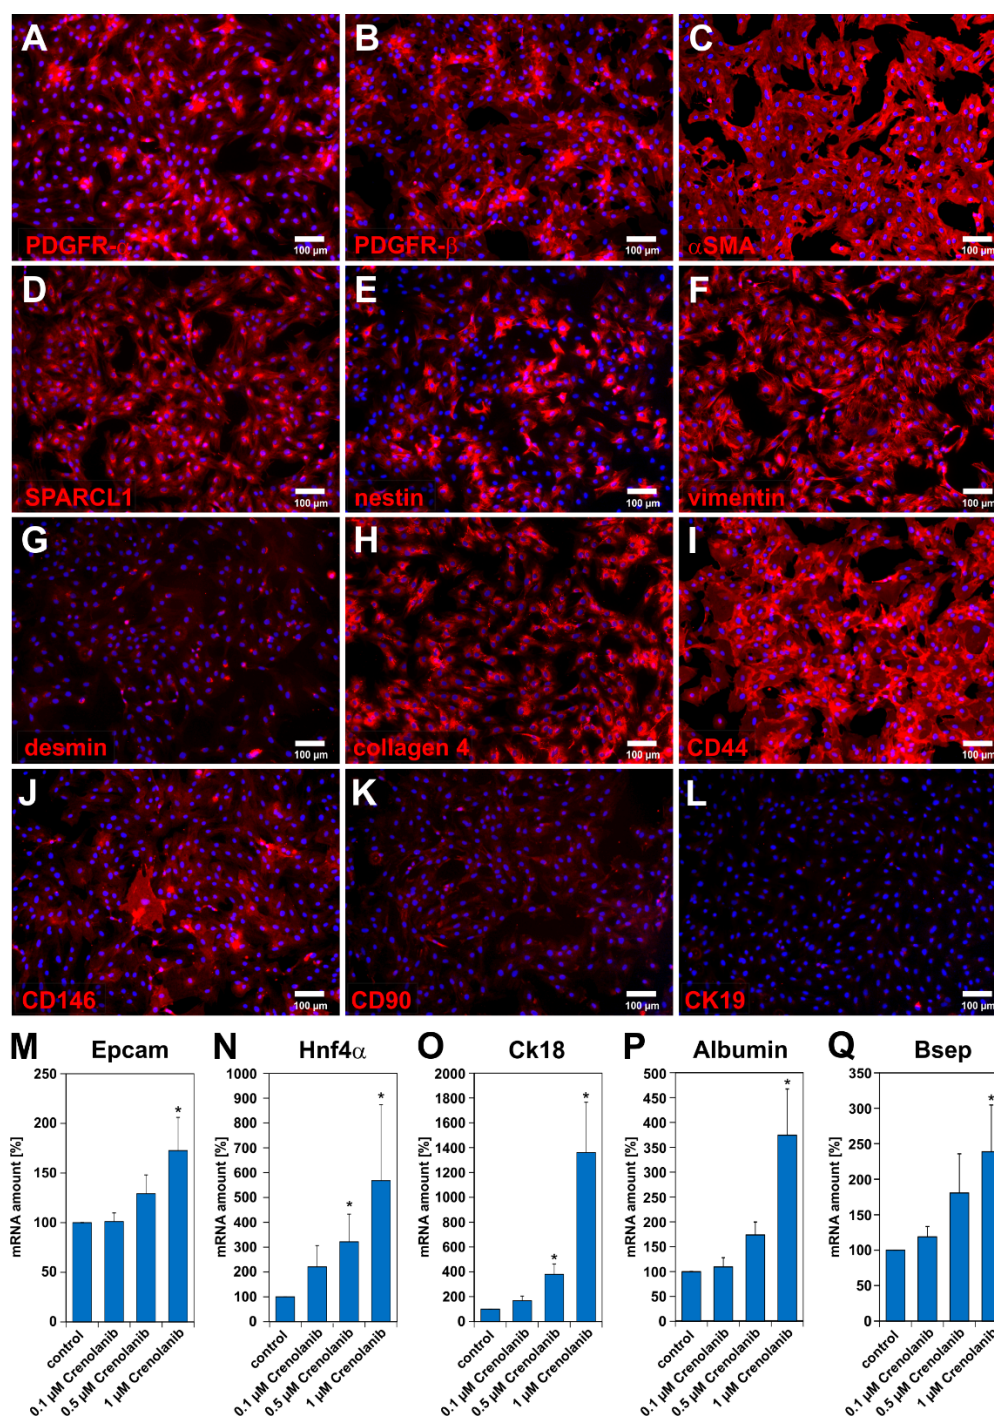

**Supplemental Figure S3: Crenolanib treatment of the HSC clone 5G4.** (A-K) Clonally expanded rat HSC of the clone 5G4 were characterized by immunofluorescence with markers for stellate cells and other MSC. PDGF receptors and typically stellate cell markers ( $\alpha$ SMA, SPARCL1, nestin, vimentin, desmin, collagen 4) were found. (I, J) Also MSC markers such as CD44 and CD146 were expressed by the HSC clone 5G4. (K) In contrast to this, CD90 was only weakly expressed and (L) the epithelial cell marker CK19 was absent (scale bars in A-L: 100  $\mu$ m). (M-Q) The treatment of the HSC clone 5G4 with various concentrations of Crenolanib upregulated the expression of liver progenitor cell- (*Epcam*) and hepatocyte-associated genes as investigated by qPCR (n = 3; \*p<0.05).

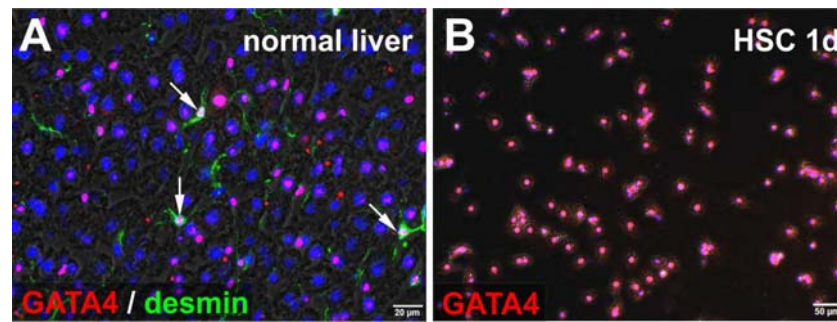

**Supplemental Figure S4: GATA4 expression by HSC.** (A) Immunofluorescence of GATA4 in tissue sections of normal rat liver. Co-staining of desmin (green) and GATA4 (red) indicated that GATA4 was already detectable in HSC *in situ* (arrows). In addition to HSC, GATA4 was also expressed to various degrees by hepatocytes. (B) Strong nuclear localization of GATA4 was maintained in freshly isolated HSC cultured for 1 day (scale bars in A and B: 50  $\mu$ m).

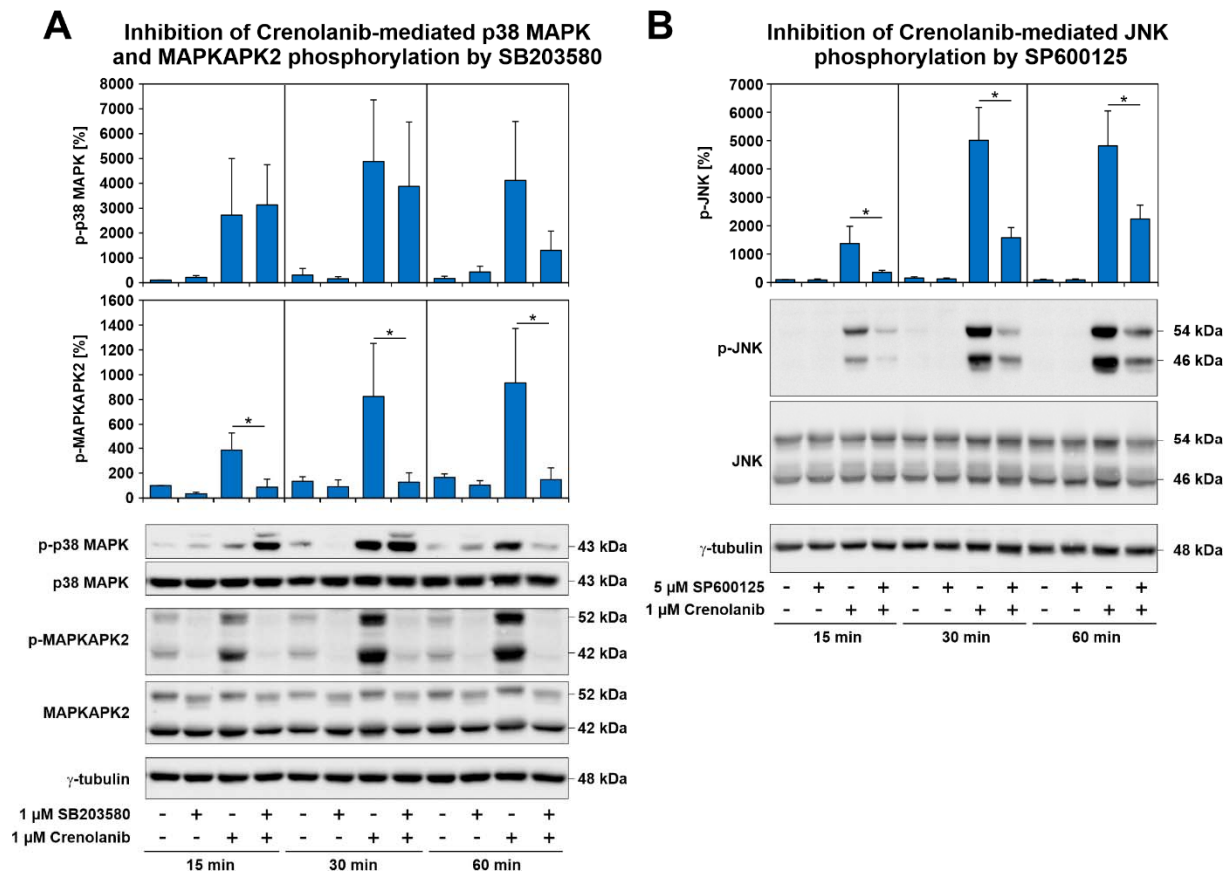

**Supplemental Figure S5: Evaluation of p38 MAPK/MAPKAP2 and JNK inhibitors in Crenolanib-treated HSC.** (A) The suitability of 1  $\mu$ M SB203580 to suppress p38 MAPK signaling was tested by Western blot using antibodies against p38 MAPK and its downstream signaling element MAPKAP2 in its phosphorylated form. Densitometry analysis of protein bands revealed that Crenolanib-mediated p38 MAPK phosphorylation was not significantly altered by SB203580, but MAPKAP2 phosphorylation was significantly prevented by this inhibitor, indicating successful inhibition of p38 MAPK signaling by SB203580 in HSC ( $n = 3$ ;  $*p < 0.05$ ). (B) The suitability of the JNK inhibitor SP600125 (5  $\mu$ M) to diminish Crenolanib-induced JNK phosphorylation in HSC was also tested by Western blot and was found to be able to reduce phosphorylated JNK significantly ( $n = 3$ ;  $*p < 0.05$ ). The protein  $\gamma$ -tubulin as well as total p38 MAPK and total JNK served as a loading controls and were used for normalization.

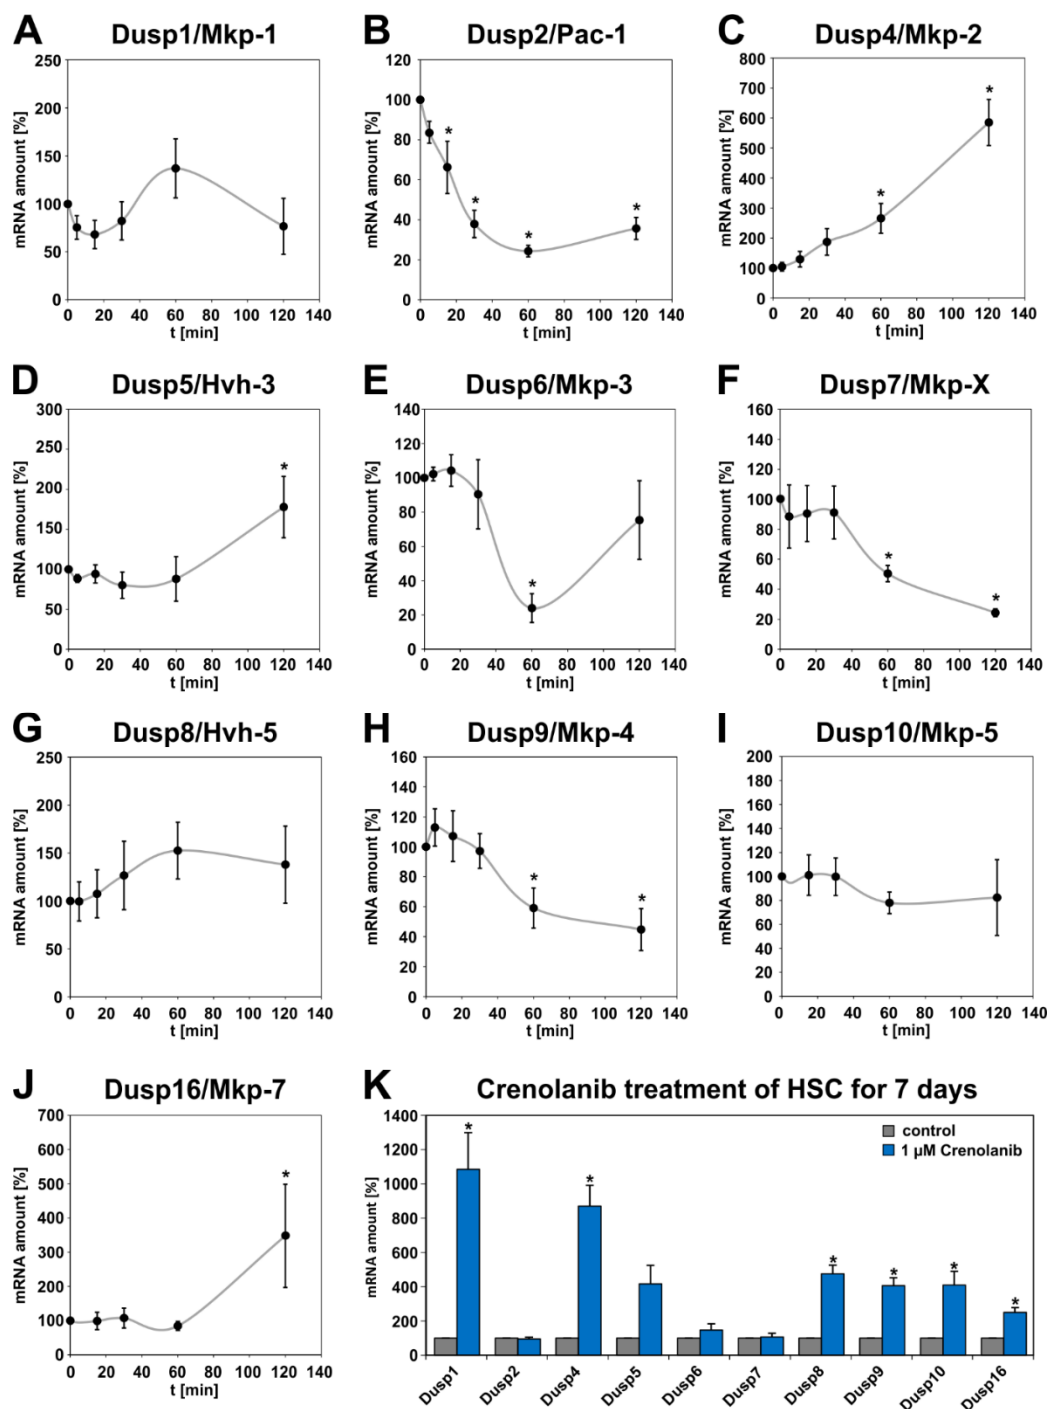

**Supplemental Figure S6: Expression of dual-specificity phosphatases (Dusp/mitogen-activated protein kinase phosphatase/Mkp) in HSC after short- and long-term treatment with Crenolanib.** (A–J) HSC were treated with 1  $\mu$ M Crenolanib and analyzed with respect to *Dusp* expression by qPCR at indicated time points ( $n = 4$ ;  $*p < 0.05$ ). Short-term stimulation of HSC with Crenolanib for up to 120 min indicated that some *Dusp* might be involved in elevated p38 MAPK and JNK signaling as indicated by downregulation of mRNA amounts. (K) However, analysis of long-term stimulated HSC over 7 days by qPCR revealed either no alteration or an increase in *Dusp* expression, which could not explain the sustained kinase activation in response to Crenolanib ( $n = 3$ ;  $*p < 0.05$ ).

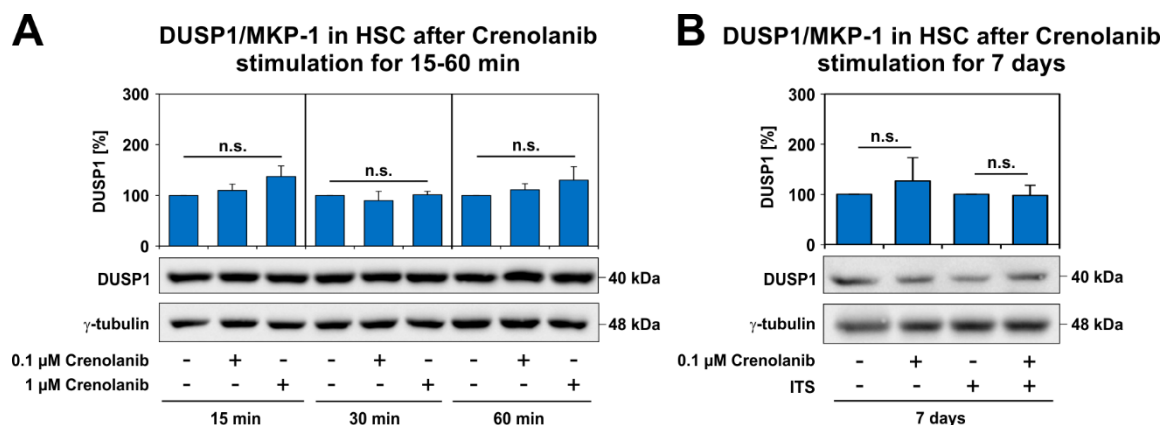

**Supplemental Figure S7: DUSP1 protein levels in HSC after Crenolanib treatment.** Since *Dusp1* expression was found to be highly upregulated in HSC by Crenolanib, this phosphatase was also analyzed at protein level by Western blot. (A) DUSP1 protein levels were analyzed in HSC cultured in medium without ITS at indicated time points (n = 3). (B) The presence of ITS in the culture medium had no obvious effect on the DUSP1 levels after treatment of HSC with 0.1  $\mu$ M Crenolanib for 7 days (n = 3; p < 0.05).

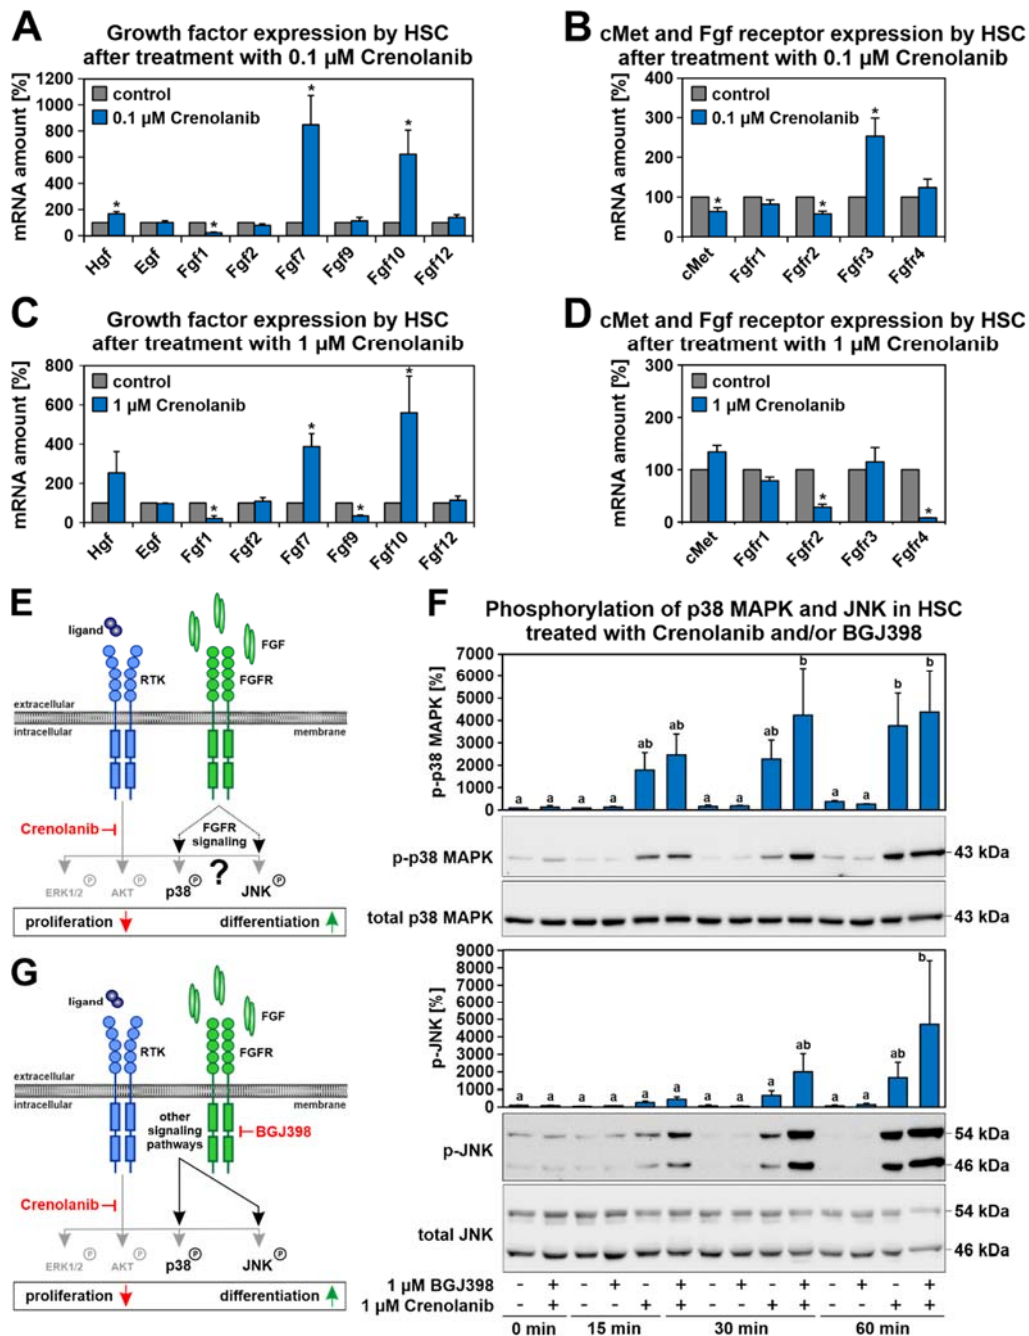

**Supplemental Figure S8: Inhibition of FGF signaling in Crenolanib-treated HSC.** To identify the mechanism responsible for Crenolanib-mediated endodermal specification of HSC, (A, C) growth factors and (B, D) receptors known to control developmental fate decisions in stem/progenitor cells were analyzed by pPCR in HSC treated with 0.1 or 1  $\mu$ M Crenolanib for 7 days ( $n = 4-10$ ;  $*p < 0.05$ ). Hepatocyte growth factor (*Hgf*), *Fgf7* and *Fgf10* were found to be upregulated in HSC in response to Crenolanib treatment, while only the mRNA levels of *Fgfr3* increased significantly at 0.1  $\mu$ M Crenolanib. Elevating the Crenolanib amount to 1  $\mu$ M prevented increased *Fgfr3* expression. (E) To evaluate the hypothesis that autocrine or paracrine stimulation of HSC by growth factors is involved in Crenolanib-mediated endodermal specification of HSC, the FGFR inhibitor BGJ398 was used. (F) HSC were pre-treated with 1  $\mu$ M BGJ398 before 1  $\mu$ M Crenolanib was applied. Western blot analysis indicated no inhibition of p38 MAPK and JNK phosphorylation by BGJ398 after short-term stimulation with Crenolanib (15–60 min;  $n = 3$ ;  $p < 0.05$ ; significant differences are indicated by different letters). (G) This suggested that FGFR signaling had little or no effect on Crenolanib-mediated p38 MAPK and JNK activation. Other signaling pathways seem to be responsible for this process.

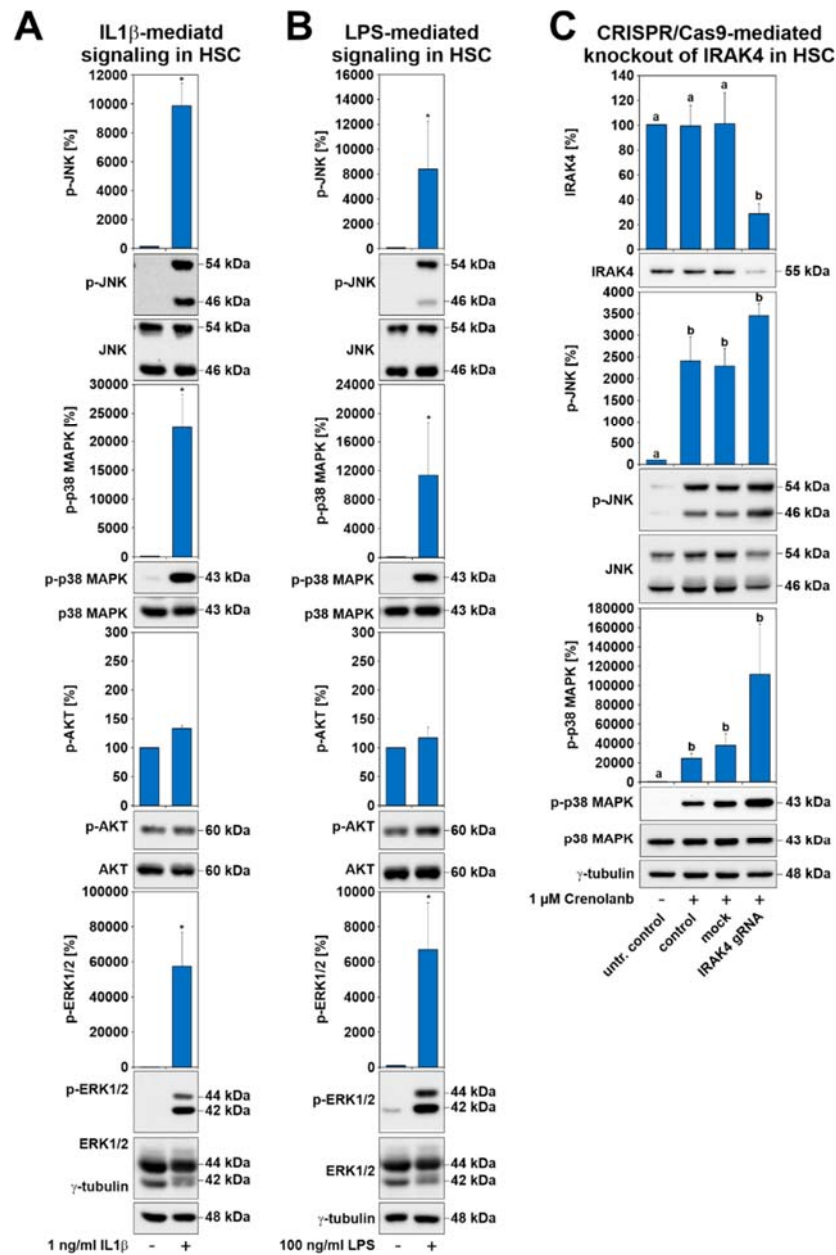

**Supplemental Figure S9: IL1 $\beta$  and LPS-mediated p38 MAPK and JNK activation in HSC.** IL1 $\beta$  and LPS are known to trigger p38 MAPK and JNK activation via IL1R and TLR4 signaling. Therefore, activated HSC were treated with 1 ng/ml IL1 $\beta$  or 100 ng/ml LPS, to evaluate the concept that Crenolanib might exert its effects on p38 MAPK and JNK signaling through these receptors. (A, B) IL1 $\beta$  and LPS were able to activate p38 MAPK and JNK in HSC but increased also ERK1/2 phosphorylation. In contrast, AKT phosphorylation remained unchanged in HSC after stimulation with IL1 $\beta$  and LPS (n = 3; \*p < 0.05). (C) IRAK4 is a downstream factor of IL1R and TLR4 pathways. Therefore, the IRAK4 gene was deleted by CRISPR/Cas9-mediated knockout in HSC. IRAK4 protein levels were significantly reduced by this method, but HSC treated with 1  $\mu$ M Crenolanib still showed p38 MAPK and JNK phosphorylation compared to the mock control transfected with Cas9 only (n = 3; p < 0.05; significant differences are indicated by different letters).
